# Supplementary material for: “Detoxify or Die”: Qualitative Assessments of Ontario Nutritionists’ and Dietitians’ Blog Posts Related to Detoxification Diets
Source: Atypon-hosted journal article supplement (doi:10.3148/cjdpr-2018-047), 2019-02-06
Supplement: cjdpr-2018-047suppla.pdf [file cjdpr-2018-047suppla.pdf]

**Supplementary Table 1:** Skeleton of Categorization Matrices Used in Qualitative Content Analysis Process

|                                                                                             | Not necessary for metal detox                         | Not necessary for synthetic chemical detox | Potentially helpful for reducing very high levels of toxins in certain circumstances (electrical workers – PCBs and HCBs, collapse of the World Trade Centre, firefighters in a transformer fire – PCBs), but future research needed | Potential for certain nutritional components (coriander, malic acid, citric acid, succinic acid, citrus pectin, chlorella, nori, selenium) to have detoxification properties, but future research is needed | Peer-reviewed evidence cited in blog post? |
|---------------------------------------------------------------------------------------------|-------------------------------------------------------|--------------------------------------------|--------------------------------------------------------------------------------------------------------------------------------------------------------------------------------------------------------------------------------------|-------------------------------------------------------------------------------------------------------------------------------------------------------------------------------------------------------------|--------------------------------------------|
| Key Finding 1: Detox diets are not necessary to enhance weight                              |                                                       |                                            |                                                                                                                                                                                                                                      |                                                                                                                                                                                                             |                                            |
| Inconsistent (with the review), Consistent (with the review) or Not Mentioned (in the blog) |                                                       |                                            |                                                                                                                                                                                                                                      |                                                                                                                                                                                                             |                                            |
|                                                                                             | Limited research available to determine effectiveness | Increased stress                           | Overly restrictive                                                                                                                                                                                                                   | Produces side effects                                                                                                                                                                                       | Not sustainable                            |
| Key Finding 2: Detox diets are not effective for weight management                          |                                                       |                                            |                                                                                                                                                                                                                                      |                                                                                                                                                                                                             |                                            |
| Inconsistent (with the review), Consistent (with the review) or Not Mentioned (in the blog) |                                                       |                                            |                                                                                                                                                                                                                                      |                                                                                                                                                                                                             |                                            |

|                                                                                                    | <b>Severe energy restriction</b> | <b>Nutritional inadequacy</b> | <b>Supplement, laxative, diuretic, water overdosing</b> | <b>Lack of detox diet industry regulation</b> | <b>Inconsistent components/ definitions of detox diets</b> |
|----------------------------------------------------------------------------------------------------|----------------------------------|-------------------------------|---------------------------------------------------------|-----------------------------------------------|------------------------------------------------------------|
| <b>Key Finding 3: Detox diets do pose some potential dangers</b>                                   |                                  |                               |                                                         |                                               |                                                            |
| <b>Inconsistent (with the review), Consistent (with the review) or Not Mentioned (in the blog)</b> |                                  |                               |                                                         |                                               |                                                            |

Information included in the skeleton of the categorization matrices was outlined in the most recent critical review article of detox diets:

Klein AV, Kiat H. Detox diets for toxin elimination and weight management: a critical review of the evidence. *J Hum Nutr Diet.* 2015;28:675–86. doi:10.1111/jhn.12286.
